# Supplementary material for: Neocortical pyramidal neurons with axons emerging from dendrites are frequent in non-primates, but rare in monkey and human
Source: eLife. 2022 Apr 20;11:e76101. doi: 10.7554/eLife.76101 (PMC9159751; doi:10.7554/eLife.76101)
Supplement: Figure 3—source data 1. [file elife-76101-fig3-data1.xlsx]

## Sheet: source data 1 for Figure 3A,B
Source data for Figure 3A													Source data for Figure 3B						Statistical comparisons done for Figure 3B
Species, compartment:	Pig, GM	Mouse, L V	Rat, GM	Cat, WM	Cat, L VI	Cat, GM	Ferret, GM	Macaque, GM	Human, WM	Human, GM			Species	Method	Percentage AcD neurons from total neurons by layer				all non-primate supra	all macaque supra	Summary
AcD cells [%]	20.11	17.416	17.82	37.5	20.18	12.88	16.56	4.93	8.69	2.58									22.04	2.79
from total neurons	20.99	11.78	15.07	44.67	17.65	14.92	14.66	3.1	8.88	2.79			Pig		supragranular	infragranular			15.06	2.93
		15.79		47.37	14.89	13.44	11.3	4.26	8.7	0.79			3 months, wild boar	SMI-32/βIV-spectrin immunofluorescence	22.04	19.05			15.65	3.23
		18.84			20	17.14	13.07	5.99	9.18	1.92									14.42	2.59
		21.93			17.95	13.93		6.75		0.47			Rat						12.5	2.51
		14.82				19.13		3.58		0.71			adult male	biocytin tracing	15.06	17.69			18.52	4.82
		10.17				13.64		3.07		1.72			adult male	biocytin tracing	15.65	16.46			13.12	1.57
								4.51		2.02									19.34	1.28
										2.59			Cat						11.49	1.28
										1.53			Individual 1	SMI-32/βIV-spectrin immunofluorescence	14.42	14.55			15.95	1.34
										2.48			Individual 3	biocytin tracing	12.5	15.85			15.39
													Individual 4	biocytin tracing	18.52	12.5			10.24
													Individual 5	biocytin tracing	13.12	15.79			13.45
n	2	7	2	3	5	7	4	8	4	11			Individual 6	biocytin tracing	19.34	18.37
mean	20.55	15.82	16.45	43.18	18.13	15.011	13.9	4.524	8.86	1.782			Individual 7	biocytin tracing	11.49	19.33			Mann-Whitney U statistics		p = <0.001
median	20.55	15.79	16.45	44.67	17.95	13.93	13.87	4.385	8.79	1.92									Statistics done with SigmaPlot 12.3
S.D.	0.622	4.046	1.945	5.101	2.148	2.294	2.244	1.329	0.229	0.824
SEM.	0.44	1.529	1.375	2.945	0.961	0.867	1.122	0.47	0.114	0.248			Ferret
C.I. of mean	5.591	3.741	17.471	12.671	2.667	2.121	3.57	1.111	0.364	0.554			Individual 1	biocytin tracing	15.95	18.57		n	13	10
Missing Data	0	0	0	0	0	0	0	0	0	0			Individual 2	biocytin tracing	15.39	13.11		mean	15.167	2.434
measure of effect size	n.a.	n.a.	n.a.	n.a.	n.a.	n.a.	n.a.	n.a.	n.a.	n.a.			Individual 3	biocytin tracing	10.24	14.06		median	15.06	2.55
													Individual 4	biocytin tracing	13.45	12.26		S.D.	3.284	1.122
																		SEM.	0.911	0.355
													Macaque, adult					C.I. of mean	1.984	0.803
													Individual 1	biocytin tracing	2.79	11.38		Missing Data	0	0
Histological material for Figure 3A							Histological material for Figure 3B						Individual 2	biocytin tracing	2.93	6.32		measure of effect size	n.a.	n.a.
													Individual 3	biocytin tracing	3.23	6.25
largely determined by perpendicular tracks through all layers (pia-to-WM-and-back) in a first round of counting							determined by surface-parallel tracks through upper and lower layers in a second round of counting						Individual 4	SMI-32/βIV-spectrin immunofluorescence	2.59	13.95
													Individual 5	SMI-32/βIV-spectrin immunofluorescence	2.51	12.72
Species, compartment:	individual	# of sections	thickness, spacing	# confocal stacks	# of neurons		individual	# of sections	thickness, spacing	# confocal stacks	# of neurons		Individual 6	Golgi-Kopsch	4.82	6.9			all non-primate infra	all macaque infra	Summary
Pig, GM	3 months, wild boar	2, cryostat	á 50 µm, n.a.	20	189		P90 wild boar	2 , cryostat	á 50 µm, n.a.	7 stacks supra	118 supra		Individual 7	Golgi-Kopsch	1.57	5.67			19.05	11.38
										22 stacks infra	252 infra								17.69	6.32
	5 months, domestic	2, cryostat		13	181		same; only infragranular, too weak labeling supragranular						Macaque, infant						16.46	6.25
													Individual 8	biocytin, visual	1.28	5.88			14.55	13.95
Mouse, L V, 7 animals	7 animals	4 per animal, cryostat	à 50 µm, spaced across S1	70 (10 per animal)	1000								Individual 8	SMI-32/βIV-spectrin immunofluorescence, cingulate	1.28	7.85			15.85	12.72
													Individual 8	SMI-32/βIV-spectrin immunofluorescence, premotor	1.34	9.05			12.5	6.9
																			15.79	5.67
																			18.37	5.88
	individual	# of sections	thickness, spacing	# of neurons			individual	# of sections	thickness, spacing	# of neurons			Human						19.33	7.85
Rat, GM,	adult male	10, cryostat	á 50 µm, 3 mm cortex	174			adult male	6, cryostat	á 50 µm, 1.8 mm cortex	312 supra			Individual 1	Golgi-Cox	1.45	4.44			18.57	9.05
			2 hemispheres each						2 hemispheres each	130 infra			Individual 2	Golgi-Cox	0.96	4.66			13.11
	adult male	12, cryostat	á 50 µm, 3.6 mm cortex	803			adult male	8, cryostat	á 50 µm, 2.4 mm cortex	460 supra			Individual 3	Golgi-Kopsch	0.67	0.91			14.06
			2 hemispheres each						2 hemispheres each	164 infra			Individual 4	Golgi-Kopsch	0.8	2.58			12.26
													Individual 5	Golgi-Kopsch	0	0.8
													Individual 6	Golgi-Kopsch	0	1.28
	individual	# of sections	thickness, spacing	# of neurons									Individual 7	Golgi-Kopsch	1.27	2.34			Mann-Whitney rank sum test		p = <0.001
Cat, WM,	6 animals	22, vibratome	á 80-120 µm , n.a.	133			n.a.						Individual 10	Golgi-Kopsch	1.77	3.1			Statistics done with SigmaPlot 12.3
Cat , L VI, 10 animals	10 animals	>50, vibratome	á ~100 µm, n.a.	281			n.a.
																		n	13	10
																		mean	15.968	8.597
	individual	# of sections	thickness, spacing	# confocal stacks	# of neurons		individual	# of sections	thickness, spacing	# confocal stacks	# of neurons							median	15.85	7.375
Cat, GM	Individual 1, 3 months	3, cryostat	á 50 µm, n.a.	25	978		Individual 1, 3 months	3+2, cryostat	n.a.	25+13	110 supra							S.D.	2.52	3.049
											1474 infra							SEM.	0.699	0.964
	Individual. 2, adult	2, cryostat	á 50 µm, n.a.	13	496		Individual. 2, adult	same; only infragranular, pooled to the 3 months indiv.; too weak labeling supragranular										C.I. of mean	1.523	2.181
																		Missing Data	0	0
																		measure of effect size	n.a.	n.a.
	individual	# of sections	thickness, spacing	# of neurons			individual	# of sections	thickness, spacing	# of neurons
			injection site(s)						injection site(s)
Cat, GM	Individual. 3, adult	12, cryostat	á 50 µm, 4.8 mm cortex	655			Individual. 3, adult	12, cryostat	á 50 µm, 4.8 mm cortex	474 supra
			LG						LG	183 infra
LG, lateral gyrus	Individual. 4, adult	14, cryostat	á 50 µm, 5.6 mm cortex	70			Individual. 4, adult	14, cryostat	á 50 µm, 5.6 mm cortex	54 supra
SSG, suprasylvean gyrus			LG, SSG						LG, SSG	16 infra
	Individual. 5, adult	44, cryostat	á 50 µm, 17,.6 mm cortex	316			Individual. 5, adult	44, cryostat	á 50 µm, 17,.6 mm cortex	221 supra
			LG, SSG						LG, SSG	95 infra
	Individual. 6, adult	40, cryostat	á 50 µm, 16 mm cortex	230			Individual. 6, adult	40, cryostat	á 50 µm, 16 mm cortex	181 supra
			LG						LG	49 infra
	Individual. 7, adult	38. cryostat	á 50 µm, 15.2 mm cortex	174			Individual. 7, adult	38. cryostat	á 50 µm, 15.2 mm cortex	148 supra
			LG						LG	26 infra
	individual	# of sections	thickness, spacing,	# of neurons			individual	# of sections	thickness, spacing	# of neurons
Ferret	Individual 1	8, cryostat	á 20 µm, 0.8 mm cortex	302			Individual 1	8, cryostat	á 20 µm, 0.8 mm cortex	232 supra
										70 infra
	Individual 2	22, cryostat	á 24 µm, 2.2 mm cortex	191			Individual 2	22, cryostat	á 24 µm, 2.2 mm cortex	130 supra
										61 infra
	Individual 3	14, cryostat	á 20 µm, 1.4 mm cortex	230			Individual 3	14, cryostat	á 20 µm, 1.4 mm cortex	166 supra
										64 infra
	Individual 4	20, cryostat	á 20 µm, 2 mm cortex	329			Individual 4	20, cryostat	á 20 µm, 2 mm cortex	223 supra
										106 infra
	individual	# of sections	thickness, spacing,	# of neurons			individual	# of sections	thickness, spacing	# of neurons
Macaque, GM
	Individual 1	30, cryostat	á 50 µm, 6.0 mm cortex	954			Individual 1	14, cryostat	á 50 µm, 6.0 mm cortex	826 supra
										167 infra
	Individual 2	17, cryostat	á 50 µm, 8.4 mm cortex	816			Individual 2	18, cryostat	á 50 µm, 9.0 mm cortex	750 supra
										269 infra
	Individual 3	20, cryostat	á 50 µm, 4.0 mm cortex	184			Individual 3	20, cryostat	á 50 µm, 4.0 mm cortex	279 supra
										144 infra
	Individual 8, infant, visual	24, cryostat	á 50 µm, 9.6 mm cortex	377			Individual 8, infant, visual	24, cryostat	á 50 µm, 9.6 mm cortex	156 supra
										221 infra
							individual	# of sections	thickness, spacing	# confocal stacks	# of neurons
							Individual 8, infant, cingulate	2, cryostat	á 50 µm, n.a.	4	156 supra
	individual	# of sections	thickness, spacing,	# confocal stacks	# of neurons						344 infra
	Individual 4	2, cryostat	á 50 µm, n.a.	20	717		Individual 8, infant, premotor	2, cryostat	á 50 µm, n.a.	14	597 supra
											652 infra
	Individual 5	2, cryostat	á 50 µm, n.a.	12	681
							individual	# of sections	thickness, spacing,	# confocal stacks	# of neurons
							Individual 4	2, cryostat	á 50 µm, n.a.	20	502 supra
	individual	# of sections	thickness	# of neurons							215 infra
	Individual 6	20, hand-cut	200-250 µm	307			Individual 5	2, cryostat	á 50 µm, n.a.	12	398 supra
	Individual 7	20, hand-cut	200-250 µm	228							283 infra
in human meterial, AcD were assessed by layers from the beginning and shared root cells were also scored
Human, GM	individual	# of sections	thickness, spacing,	# of neurons
	Individuals 1 and 2	4 and 8, vibratome	~150 µm, n.a.	1471
	Individuals 3-11	15-20 each, hand-cut	200-250 µm, n.a.	3258
Human, WM	individual	# of sections	thickness, spacing,	# of neurons
	Individuals 3-6	15-20 each, hand-cut	200-250 µm, n.a.	417
Abbreviations
n.a., not applicable
supra, supragranular layers
infra, infragranular layers
µm, micrometer
mm, millimeter
GM, gray matter layer II-VI
WM, white matter
