# Supplementary material for: Neocortical pyramidal neurons with axons emerging from dendrites are frequent in non-primates, but rare in monkey and human
Source: eLife. 2022 Apr 20;11:e76101. doi: 10.7554/eLife.76101 (PMC9159751; doi:10.7554/eLife.76101)
Supplement: Figure 4—source data 1. [file elife-76101-fig4-data1.xlsx]

## Sheet: source data 1 for Figure 3A,B
Source data for Figure 3A													Source data for Figure 3B						Statistical comparisons done for Figure 3B
Species, compartment:	Pig, GM	Mouse, L V	Rat, GM	Cat, WM	Cat, L VI	Cat, GM	Ferret, GM	Macaque, GM	Human, WM	Human, GM			Species	Method	Percentage AcD neurons from total neurons by layer				all non-primate supra	all primate supra	Summary		monkey supra	human supra	Summary
AcD cells [%]	20.11	17.416	17.82	37.5	20.18	12.88	16.56	4.93	8.69	2.58									22.04	2.79			2.79	1.45
from total neurons	20.99	11.78	15.07	44.67	17.65	14.92	14.66	3.1	8.88	2.79			Pig		supragranular	infragranular			15.06	3.23			3.23	0.96
		15.79		47.37	14.89	13.44	11.3	4.26	8.7	0.79			3 months, wild boar	SMI-32/βIV-spectrin immunofluorescence	22.04	19.05			15.06	2.93			2.93	0.67
		18.84			20	17.14	13.07	5.99	9.18	1.92									14.42	2.59			2.59	0.8
		21.93			17.95	13.93		6.75		0.47			Rat						15.95	2.51			2.51	0
		14.82				19.13		3.58		0.71			adult male	biocytin tracing	15.06	17.69			15.39	4.82			4.82	0
		10.17				13.64		3.07		1.72			adult male	biocytin tracing	15.65	16.46			10.24	1.57			1.57
								infant is 4,51		4 prefrontal+Area18									13.45	1.36			1.36
GM, gray matter LII-VI										2.02			Cat							1.45
WM, white matter										2.59			Individual 1	SMI-32/βIV-spectrin immunofluorescence	14.42	14.55				0.96
										1.53			Individual 3	biocytin tracing	12.5	15.85				0.67
										2.48			Individual 4	biocytin tracing	18.52	12.5				0.8
													Individual 5	biocytin tracing	13.12	15.79				0
n	2	7	2	3	5	6	4	8	4	11			Individual 6	biocytin tracing	19.34	18.37				0
mean	20.55	15.82	16.45	43.18	18.13		13.9		8.86				Individual 7	biocytin tracing	11.49	19.33
median	20.55	15.79	16.45	44.67	17.95		13.87		8.79										Mann-Whitney U statistics		p = <0.001		Mann-Whitney U statistics		p = 0.001
S.D.	0.622	4.046	1.945	5.101	2.148		2.244		0.229										Statistics done with SigmaPlot 12.3				Statistics done with SigmaPlot 12.3
SEM.	0.44	1.529	1.375	2.945	0.961		1.122		0.114				Ferret
C.I. of mean	5.591	3.741	17.471	12.671	2.667		3.57		0.364				Individual 1	biocytin tracing	15.95	18.57
Missing Data	0	0	0	0	0	0	0	0	0	0			Individual 2	biocytin tracing	15.39	13.11		n	8	14			8	6
measure of effect size	n.a.	n.a.	n.a.	n.a.	n.a.	n.a.	n.a.	n.a.	n.a.	n.a.			Individual 3	biocytin tracing	10.24	14.06		mean	15.2	1.83			2.73	0.65
													Individual 4	biocytin tracing	13.45	12.26		median	15.06	1.51			2.69	0.74
																		S.D.	3.288	1.369			1.066	0.566
													Macaque, adult					SEM.	1.163	0.366			0.377	0.231
													Individual 1	biocytin tracing	2.79	11.38		C.I. of mean	2.74	0.79			0.891	0.594
													Individual 2	biocytin tracing	2.93	6.32		Missing Data	0	0			0	0
													Individual 3	biocytin tracing	3.23	6.25		measure of effect size	n.a.	n.a.			n.a.	n.a.
Histological material for Figure 3A							Histological material for Figure 3B						Individual 4	SMI-32/βIV-spectrin immunofluorescence	2.59	13.95
													Individual 5	SMI-32/βIV-spectrin immunofluorescence	2.51	12.72
Species, compartment:	individual	# of sections	thickness, spacing	# confocal stacks	# of neurons		individual	# of sections	thickness, spacing	# confocal stacks	# of neurons		Individual 6	Golgi-Kopsch	4.82	6.9
Pig, GM	3 months, wild boar	2, cryostat	á 50 µm, n.a.	20	189		P90 wild boar	2 , cryostat	á 50 µm, n.a.	7 stacks supra	118 supra		Individual 7	Golgi-Kopsch	1.57	5.67			all non-primate infra	all primate infra	Summary		monkey infra	human infra	Summary
										22 stacks infra	252 infra								19.05	11.38			11.38	4.4
	5 months, domestic	2, cryostat		13	181		same; only infragranular, too weak labeling supragranular						Macaque, infant						17.69	6.25			6.25	4.46
													Individual 8	SMI-32/βIV-spectrin immunofluorescence	1.28	7.85			16.46	6.32			6.32	0.91
Mouse, L V, 7 animals	7 animals	4 per animal, cryostat	à 50 µm, spaced across S1	70 (10 per animal)	1000									cingulate cortex	1.34	9.05			14.55	13.95			13.95	2.58
														premotor cortex					18.57	12.72			12.72	0.8
																			13.11	6.9			6.9	1.28
													Human						14.06	5.67			5.67
	individual	# of sections	thickness, spacing	# of neurons			individual	# of sections	thickness, spacing	# of neurons			Individual 1	Golgi-Cox	1.47	4.44			12.26	8.32			8.32
Rat, GM,	adult male	10, cryostat	á 50 µm, 3 mm cortex	174			adult male	6, cryostat	á 50 µm, 1.8 mm cortex	312 supra			Individual 2	Golgi-Cox	0.96	4.66				4.4
			2 hemispheres each						2 hemispheres each	130 infra			Individual 3	Golgi-Kopsch	0.67	0.91				4.46
	adult male	12, cryostat	á 50 µm, 3.6 mm cortex	803			adult male	8, cryostat	á 50 µm, 2.4 mm cortex	460 supra			Individual 4	Golgi-Kopsch	0.8	2.58				0.91
			2 hemispheres each						2 hemispheres each	164 infra			Individual 5	Golgi-Kopsch	0	0.8				2.58
													Individual 6	Golgi-Kopsch	0	1.28				0.8
													Individual 7	Golgi-Kopsch	1.27	2.34				1.28
	individual	# of sections	thickness, spacing	# of neurons									Individual 10	Golgi-Kopsch	1.77	3.1
Cat, WM,	6 animals	22, vibratome	á 80-120 µm , n.a.	133			n.a.												Mann-Whitney U rank sum test		p = <0.001		Mann-Whitney U rank sum test		p = <0.001
																			Statistics done with SigmaPlot 12.3				Statistics done with SigmaPlot 12.3
Cat , L VI, 10 animals	10 animals	>50, vibratome	á ~100 µm, n.a.	281			n.a.
																		n	8	14			8	6
	individual	# of sections	thickness, spacing	# confocal stacks	# of neurons		individual	# of sections	thickness, spacing	# confocal stacks	# of neurons							mean	15.72	6.14			8.94	2.41
Cat, GM	Individual 1, 3 months	3, cryostat	á 50 µm, n.a.	25	978		Individual 1, 3 months	3+2, cryostat	n.a.	25+13	110 supra							median	15.51	5.96			7.61	1.93
											1474 infra							S.D.	2.579	4.255			3.266	1.692
	Individual. 2, adult	2, cryostat	á 50 µm, n.a.	13	496		Individual. 2, adult	same; only infragranular, pooled to the 3 months indiv.; too weak labeling supragranular										SEM.	0.912	1.137			1.155	0.691
																		C.I. of mean	2.156	2.457			2.731	1.775
																		Missing Data	0	0			0	0
																		measure of effect size	n.a.	n.a.			n.a.	n.a.
	individual	# of sections	thickness, spacing	# of neurons			individual	# of sections	thickness, spacing	# of neurons
			injection site(s)						injection site(s)
Cat, GM	Individual. 3, adult	12, cryostat	á 50 µm, 4.8 mm cortex	655			Individual. 3, adult	12, cryostat	á 50 µm, 4.8 mm cortex	474 supra
			LG						LG	183 infra
LG, lateral gyrus	Individual. 4, adult	14, cryostat	á 50 µm, 5.6 mm cortex	70			Individual. 4, adult	14, cryostat	á 50 µm, 5.6 mm cortex	54 supra
SSG, suprasylvean gyrus			LG, SSG						LG, SSG	16 infra
	Individual. 5, adult	44, cryostat	á 50 µm, 17,.6 mm cortex	316			Individual. 5, adult	44, cryostat	á 50 µm, 17,.6 mm cortex	221 supra
			LG, SSG						LG, SSG	95 infra
	Individual. 6, adult	40, cryostat	á 50 µm, 16 mm cortex	230			Individual. 6, adult	40, cryostat	á 50 µm, 16 mm cortex	181 supra
			LG						LG	49 infra
	Individual. 7, adult	38. cryostat	á 50 µm, 15.2 mm cortex	174			Individual. 7, adult	38. cryostat	á 50 µm, 15.2 mm cortex	148 supra
			LG						LG	26 infra
	individual	# of sections	thickness, spacing,	# of neurons			individual	# of sections	thickness, spacing	# of neurons
Ferret	Individual 1	8, cryostat	á 20 µm, 0.8 mm cortex	302			Individual 1	8, cryostat	á 20 µm, 0.8 mm cortex	232 supra
										70 infra
	Individual 2	22, cryostat	á 24 µm, 2.2 mm cortex	191			Individual 2	22, cryostat	á 24 µm, 2.2 mm cortex	130 supra
										61 infra
	Individual 3	14, cryostat	á 20 µm, 1.4 mm cortex	230			Individual 3	14, cryostat	á 20 µm, 1.4 mm cortex	166 supra
										64 infra
	Individual 4	20, cryostat	á 20 µm, 2 mm cortex	329			Individual 4	20, cryostat	á 20 µm, 2 mm cortex	223 supra
										106 infra
	individual	# of sections	thickness, spacing,	# of neurons			individual	# of sections	thickness, spacing	# of neurons
Macaque, GM
	Individual 1 Bob	30, cryostat	á 50 µm, 6.0 mm cortex	954			Individual 1 Bob	14, cryostat	á 50 µm, 6.0 mm cortex	826 supra
										167 infra
	Individual 2, Platon	18, cryostat	á 50 µm, 9.0 mm cortex	1019			Individual 2, Platon	18, cryostat	á 50 µm, 9.0 mm cortex	750 supra
										269 infra
	Individual 3, Franz	20, cryostat	á 50 µm, 4.0 mm cortex	423			Individual 3, Franz	20, cryostat	á 50 µm, 4.0 mm cortex	279 supra
										144 infra
	Individual 8, infant, visual	24, cryostat	á 50 µm, 9.6 mm cortex	377			individual	# of sections	thickness, spacing	# confocal stacks	# of neurons
							Individual 8, infant, cingulate	2, cryostat	á 50 µm, n.a.	4	344 supra
											156 infra
							Individual 8, infant, premotor	2, cryostat	á 50 µm, n.a.	14	597 supra
											652 infra
	individual	# of sections	thickness, spacing,	# confocal stacks	# of neurons		individual	# of sections	thickness, spacing,	# confocal stacks	# of neurons
	Individual 4	2, cryostat	á 50 µm, n.a.	20	717		Individual 4	2, cryostat	á 50 µm, n.a.	20	502 supra
											215 infra
	Individual 5	2, cryostat	á 50 µm, n.a.	12	681		Individual 5	2, cryostat	á 50 µm, n.a.	12	398 supra
											283 infra
	individual	# of sections	thickness	# of neurons
	Individual 6	20, hand-cut	200-250 µm	307
	Individual 7	20, hand-cut	200-250 µm	228
Human, GM	individual	# of sections	thickness, spacing,	# of neurons
	Individuals 1 and 2	4 and 8, vibratome	~150 µm, n.a.	1471
	Individuals 3-11	15-20 each, hand-cut	200-250 µm, n.a.	3258
Human, WM	individual	# of sections	thickness, spacing,	# of neurons
	Individuals 3-6	15-20 each, hand-cut	200-250 µm, n.a.	417

## Sheet: source data 2 for Figure 4A, B
Source data and histological material for the table shown in Figure 4A											Source data for table and graph "areal comparison" in Figure 4B							Source data for table and graph "cat-ferret comparison" shown in Figure 4B
																		Values from Figure 3-figure supplement Table 2
Macaque											Cat, GM	%AcD	%AcD	Summary					cat	ferret
	cortical area	# of sections	thickness, spacing	# confocal stacks	% AcD cells	% shared root cells	# of neurons					in area 17	in areas 18, 19,21						% AcD	% AcD	Summary
Individual 2	V1	2, cryostat	á 50 µm, n.a.	16	3.12	1.15	609					12.25	16.02						13.35	16.56
	A1	2, cryostat	á 50 µm, n.a.	23	5.09	1.7	471					15	20						14.92	14.66
	S2	2, cryostat	á 50 µm, n.a.	16	3.02	0.93	430					11.46	15						13.44	11.3
	cingulate	2, cryostat	á 50 µm, n.a.	10	5.97	2.13	704					17.57	20.53						17.14	13.07
	intraparietal	2, cryostat	á 50 µm, n.a.	14	5.43	0.64	313					14.81	12.25						13.92
	dorsoparietal	2, cryostat	á 50 µm, n.a.	14	4.26	1	399												19.13
																			12.64
	cortical area	# of sections	thickness	# confocal stacks	% AcD cells	% shared root cells	# of neurons				Mann-Whitney rank sum test
Individual 4	A1	2, cryostat	á 50 µm, n.a.	13	4.74	2.19	274				Statistics done with SigmaPlot 12.3			p = 0.22			Mann-Whitney rank sum test
	V1	2, cryostat	á 50 µm, n.a.	19	4	2.4	500										Statistics done with SigmaPlot 12.3				p = 0.527
	S2	2, cryostat	á 50 µm, n.a.	11	3.57	1.19	252
	cingulate	2, cryostat	á 50 µm, n.a.	10	3.98	0.9	533				n	5	5					n	7	5
	intraparietal	2, cryostat	á 50 µm, n.a.	15	5.52	1.33	525				mean	14.218	16.76					mean	14.934	13.898
	dorsoparietal	2, cryostat	á 50 µm, n.a.	4	4.93	4.93	142				median	11.46	12.25					median	13.92	13.87
											S.D.	2.433	3.489					S.D.	2.363	2.244
											SEM.	1.088	1.56					SEM.	0.893	1.122
	cortical area	# of sections	thickness	# confocal stacks	% AcD cells	% shared root cells	# of neurons				C.I. of mean	3.021	4.332					C.I. of mean	2.185	3.57
Individual 5	V1	2, cryostat	á 50 µm, n.a.	16	3.48	0.46	431				Missing Data	0	0					Missing Data	0	0
	A1	2, cryostat	á 50 µm, n.a.	25	5.31	2.21	452				measure of effect size	n.a.	n.a.					measure of effect size	n.a.	n.a.
	S2	2, cryostat	á 50 µm, n.a.	20	6.38	2.55	549
	cingulate	2, cryostat	á 50 µm, n.a.	19	6.95	2.96	676
	intraparietal	2, cryostat	á 50 µm, n.a.	16	4.15	2.24	313				Histological Material for table and graph "areal comparison" in Figure 4B							Histological material for table and graph "cat-ferret comparison" shown in Figure 4B
	dorsoparietal	2, cryostat	á 50 µm, n.a.	14	7.14	4.76	210
												individual	# of sections	size, spacing,	# of neurons	# of neurons	# of neurons			individual	# of sections	thickness, spacing,	# of neurons
														injection site(s)	in area 17	in areas 18, 19,21	in total		Ferret	Individual 1	8, cryostat	á 20 µm, 0.8 mm cortex	302
											Cat, GM	Individual. 3, adult	12, cryostat	á 50 µm, 4.8 mm cortex	449	206	655
														LG						Individual 2	22, cryostat	á 24 µm, 2.2 mm cortex	191
												Individual. 4, adult	14, cryostat	á 50 µm, 5.6 mm cortex	40	30	70
														LG, SSG						Individual 3	14, cryostat	á 20 µm, 1.4 mm cortex	230
												Individual. 5, adult	44, cryostat	á 50 µm, 17,.6 mm cortex	96	220	316
														LG, SSG						Individual 4	20, cryostat	á 20 µm, 2 mm cortex	329
												Individual. 6, adult	40, cryostat	á 50 µm, 16 mm cortex	79	151	230
														LG
												Individual. 7, adult	38. cryostat	á 50 µm, 15.2 mm cortex	27	147	174
											LG, lateral gyrus
											SSG, suprasylvean gyrus

## Sheet: source data 3 for Figure 5A, B
	Histological material for Figure 3B
		individual	# of sections	% AcD cells	% shared root cells	# of neurons
	Ferret, GM	Individual 1	5, cryostat	15.53	7.2	264
		Individual 2	6, cryostat	11.81	5.9	288
		Individual 3	6, cryostat	14.59	3.24	185
		Individual 4	8, cryostat	14.5	3.44	262
	Rat, GM	individual	# of sections	% AcD cells	% shared root cells	# of neurons
		adult male	12, cryostat	17.1	3.43	816
		adult male	12, cryostat	14.95	5.21	883
	Human, GM	individual	# of sections	% AcD cells	% shared root cells	# of neurons
		Individual 1	3, vibratome	2.82	5.63	284
		Individual 2	4, vibratome	2.17	4.35	230
		Individual 3	15-20 each, hand-cut	0.79	2.37	253
		Individual 4		1.92	2.51	677
		Individual 5		0.47	2.79	215
		Individual 6		0.71	2.14	140
		Individual 7		1.72	3.19	407
		Individual 8		2.02	4.86	247
		Individual 9		2.59	4.25	424
		Individual 10, auditory		1.53	2.76	653
		Individual 10, area 18		2.48	5.37	242
		individual	# of sections	thickness, spacing,	% AcD cells	% shared root cells	# of neurons
	Macaque, GM	Individual 1 Bob	4, cryostat	á 50 µm, 1.6 mm cortex	5.44	2.72	294
		Individual 2, Platon ipsi	7, cryostat	á 50 µm, 1.4 mm cortex	4.86	2.78	432
			staining series DAB brown RP
		Individual 2, Platon ipsi	17, cryostat	á 50 µm, 3.5 mm cortex	3.06	5.5	816
			staining series Ni-Co intensification
		Individual 2, Platon contra	18, cryostat	á 50 µm, 9.0 mm cortex	5.38	3.23	93
		Individual 2, Platon ips	28, cryostat	á 50 µm, 14.0 mm cortex	2.87	1.64	731
		Individual 3, Franz	20, cryostat	á 50 µm, 4.0 mm cortex	3.8	4.9	184
		Individual 8, infant	9, cryostat	á 50 µm, 3.6 mm cortex	4.3	3.46	231
		individual	# of sections	thickness	% AcD cells	% shared root cells	# of neurons
		Individual 6	20, hand-cut	200-250 µm	3.58	5.21	307
		Individual 7	20, hand-cut	200-250 µm	3.07	5.54	228
		individual	# of sections	thickness	# confocal stacks	% AcD cells	% shared root cells	# of neurons
		Individual 4, parietal cortex	2, cryostat	á 50 µm, n.a.	14	7.14	4.76	210
		Individual 4, cingulate cortex	2, cryostat	á 50 µm, n.a.	16	3.51	7.89	114
		Individual 5, parietal	2, cryostat	á 50 µm, n.a.	4	4.93	4.93	142
