# Supplementary material for: Neocortical pyramidal neurons with axons emerging from dendrites are frequent in non-primates, but rare in monkey and human
Source: eLife. 2022 Apr 20;11:e76101. doi: 10.7554/eLife.76101 (PMC9159751; doi:10.7554/eLife.76101)
Supplement: Figure 5—source data 1. [file elife-76101-fig5-data1.xlsx]

## Sheet: source data 3 for Figure 5A, B
Source data for Figure 5A: all species, AcD versus shared root						test non-primate vs macaque					test non-primate vs macaque					Source data for Figure 5B
		% AcD cells	% shared root cells			% AcD cells	% AcD cells	Summary			% shared root cells	% shared root cells	Summary				Rat				Ferret				macaque				macaque				macaque				human
Rat, GM	adult male	17.1	3.43			17.1	5.44				3.43	2.72					biocytin	%	%		biocytin	%	%		biocytin	%	%		immunofluorescence	%	%		Golgi	%	%		Golgi	%	%
Biocytin	adult male	14.95	5.21			14.95	4.86				5.21	2.78						AcD	AcD+SR			AcD	AcD+SR			AcD	AcD+SR			AcD	AcD+SR			AcD	AcD+SR			AcD	AcD+SR
							3.06					5.5			SR, shared		Indiv. 1	17.1	20.53		Indiv. 1	15.5	22.7		Indiv. 1	5.44	8.16		Individual 4, cingulate cortex	3.98	4.88		Indiv. 6	3.58	8.79		Individual 1, temporal	2.82	8.45
Ferret, GM	Individual 1	15.53	7.2			15.53	5.38				7.2	3.23			root cells		Indiv.2	14.95	20.16		Indiv. 2	11.81	17.71		Indiv. 2	4.86	7.62		Individual 4, S2 cortex	3.57	4.76		Indiv. 7	3.07	10.53		Individual 2, temporal	2.17	6.52
	Individual 2	11.81	5.9			11.81	2.87				5.9	1.64									Indiv. 3	14.6	17.84		Indiv. 2	3.06	8.56		Individual 4, A1 cortex	4.74	6.93						Individual 3, auditory	0.79	3.16
Biocytin	Individual 3	14.59	3.24			14.59	3.8				3.24	4.9									Indiv. 4	14.5	17.94		Indiv. 2	5.38	8.61		Individual 4, V1 cortex	4	6.4						Individual 4, auditory	1.92	4.43
	Individual 4	14.5	3.44			14.5	4.3				3.44	3.46													Indiv. 2	2.87	4.51		Individual 4, ips cortex	5.52	6.85						Individual 5, auditory	0.47	3.26
							3.58					5.21													Indiv. 3	3.8	8.7		Individual 4, parietal	4.93	9.86						Individual 6, auditory	0.71	2.85
Human, GM	Individual 1	2.82	5.63				3.07					5.54													Indiv. 8	4.3	7.76										Individual 7, prefrontal	1.72	4.91
	Individual 2	2.17	4.35																										Individual 5, cingulate cortex	6.95	9.91						Individual 8, prefrontal	2.02	6.88
Golgi	Individual 3	0.79	2.37				5.97					2.13																	Individual 5, S2 cortex	6.38	8.93						Individual 9, prefrontal	2.59	6.84
	Individual 4	1.92	2.51				3.02					0.93																	Individual 5, A1 cortex	5.31	7.52						Individual 10, auditory	1.53	4.29
	Individual 5	0.47	2.79				5.09					1.7																	Individual 5, V1 cortex	3.48	3.94						Individual 10, visual area 18	2.48	7.85
	Individual 6	0.71	2.14				3.12					1.15																	Individual 5, ips cortex	4.15	6.39
	Individual 7	1.72	3.19				5.43					0.64																	Individual 5, parietal cortex	7.14	11.9
	Individual 8	2.02	4.86				4.26					1
	Individual 9	2.59	4.25																										Individual 2, cingulate cortex	5.97	8.1
	Individual 10, auditory	1.53	2.76				3.98					0.9																	Individual 2, S2 cortex	3.02	3.95
	Individual 10, area 18	2.48	5.37				3.57					1.19																	Individual 2, A1 cortex	5.09	6.79
							4.74					2.19																	Individual 2, V1 cortex	3.12	4.27
Macaque, GM	Individual 1	5.44	2.72				4					2.4																	Individual 2, ips cortex	5.43	6.07
	Individual 2, ipsi	4.86	2.78				5.52					1.33																	Individual 2, parietal cortex	4.26	5.26
Biocytin & Golgi	Individual 2, ipsi	3.06	5.5				4.93					4.93
	Individual 2, contra	5.38	3.23
	Individual 2, ips	2.87	1.64				6.95					2.96
	Individual 3	3.8	4.9				6.38					2.55
	Individual 8, infant	4.3	3.46				5.31					2.21
	Individual 6	3.58	5.21				3.48					0.46				Source data for Figure 5C										Source data for Figure 5D
	Individual 7	3.07	5.54				4.15					2.24
							7.14					4.76					all macaque				all macaque						macaque Individual 2				macaque Individual 2
Macaque, GM	Individual 2, cingulate cortex	5.97	2.13														immunofluorescence	% AcD	% SR		biocytin	% AcD	% SR				immunofluorescence	% AcD	% SR		biocytin	% AcD	% SR
	Individual 2, S2 cortex	3.02	0.93														Individual 4, cingulate cortex	3.98	0.9		Indiv. 1	5.44	2.72				Individual 2, cingulate cortex	5.97	2.13		Individual 2,premotor ipsi, NiCo intensif.	3.06	5.5
Immunofluorescence	Individual 2, A1 cortex	5.09	1.7			Mann-Whitney rank sum test					Mann-Whitney rank sum test						Individual 4, S2 cortex	3.57	1.19		Individual 2,premotor ipsi, NiCo intensif.	3.06	5.5				Individual 2, S2 cortex	3.02	0.93		Individual 2,premotor contra	5.38	3.23
all areas included	Individual 2, V1 cortex	3.12	1.15			Statistics done with SigmaPlot 12.3		p < 0.001			Statistics done with SigmaPlot 12.3		p = 0.008				Individual 4, A1 cortex	4.74	2.19		Individual 2,premotor contra	5.38	3.23				Individual 2, A1 cortex	5.09	1.7		Individual 2,intraparietal	2.87	1.64
	Individual 2, ips cortex	5.43	0.64														Individual 4, V1 cortex	4	2.4		Individual 2,intraparietal	2.87	1.64				Individual 2, V1 cortex	3.12	1.15		Individual 2,premotor ipsi DAB stain	4.86	2.78
	Individual 2, parietal	4.26	1		n	6	27			n	6	27					Individual 4, ips cortex	5.52	1.33		Individual 2,premotor ipsi DAB stain	4.86	2.78				Individual 2, ips cortex	5.43	0.64		Individual 2, premotor ipsi, reassesed for laminar	2.93	6.23
					mean	14.747	4.57			mean	4.737	2.617					Individual 4, parietal	4.93	4.93		Individual 2, premotor ipsi, reassesed for laminar	2.93	6.23				Individual 2, parietal cortex	4.26	1
	Individual 4, cingulate cortex	3.98	0.9		median	14.77	4.3			median	4.325	2.24									Indiv. 3	3.8	4.9
	Individual 4, S2 cortex	3.57	1.19		S.D.	1.726	1.726			S.D.	1.629	1.629					Individual 5, cingulate cortex	6.95	2.96		Indiv. 8	4.3	3.46
	Individual 4, A1 cortex	4.74	2.19		SEM.	0.705	0.705			SEM.	0.665	0.665					Individual 5, S2 cortex	6.38	2.55
	Individual 4, V1 cortex	4	2.4		C.I. of mean	1.812	1.812			C.I. of mean	1.71	1.71					Individual 5, A1 cortex	5.31	2.21
	Individual 4, ips cortex	5.52	1.33		Missing Data	0	0			Missing Data	0	0					Individual 5, V1 cortex	3.48	0.46
	Individual 4, parietal	4.93	4.93		measure of effect size	n.a.	n.a.			measure of effect size	n.a.	n.a.					Individual 5, ips cortex	4.15	2.24		Mann-Whitney rank sum test						Mann-Whitney rank sum test
																	Individual 5, parietal cortex	7.14	4.76		Statistics done with SigmaPlot 12.3						Statistics done with SigmaPlot 12.3
	Individual 5, cingulate cortex	6.95	2.96
	Individual 5, S2 cortex	6.38	2.55														Individual 2, cingulate cortex	5.97	2.13
	Individual 5, A1 cortex	5.31	2.21														Individual 2, S2 cortex	3.02	0.93		immunofluorescence	biocytin					immunofluorescence	biocytin
	Individual 5, V1 cortex	3.48	0.46														Individual 2, A1 cortex	5.09	1.7		all macaque % AcD	all macaque % AcD	p = 0.173				Indiv.2, % AcD	Indiv.2, % AcD	p = 0.247
	Individual 5, ips cortex	4.15	2.24														Individual 2, V1 cortex	3.12	1.15
	Individual 5, parietal cortex	7.14	4.76														Individual 2, ips cortex	5.43	0.64
																	Individual 2, parietal cortex	4.26	1		immunofluorescence	biocytin					immunofluorescence	biocytin
																					all macaque % SR	all macaque % SR	p = 0.005				Indiv.2, % SR	Indiv 2, % SR	p = 0.017
Histological material for Figure 5A
largely determined by perpendicular tracks through all layers (pia-to-WM-and-back) in a third round of counting of the animal material
	Rat, GM	individual	# of sections	% AcD cells	% shared root cells	# of neurons
		adult male	12, cryostat	17.1	3.43	816
		adult male	12, cryostat	14.95	5.21	883
	Ferret, GM	Individual 1	5, cryostat	15.53	7.2	264
		Individual 2	6, cryostat	11.81	5.9	288
		Individual 3	6, cryostat	14.59	3.24	185
		Individual 4	8, cryostat	14.5	3.44	262
	Human, GM	individual	# of sections	% AcD cells	% shared root cells	# of neurons
		Individual 1	3, vibratome	2.82	5.63	284
		Individual 2	4, vibratome	2.17	4.35	230
		Individual 3	15-20 each, hand-cut	0.79	2.37	253
		Individual 4	15-20 each, hand-cut	1.92	2.51	677
		Individual 5	15-20 each, hand-cut	0.47	2.79	215
		Individual 6	15-20 each, hand-cut	0.71	2.14	140
		Individual 7	15-20 each, hand-cut	1.72	3.19	407
		Individual 8	15-20 each, hand-cut	2.02	4.86	247
		Individual 9	15-20 each, hand-cut	2.59	4.25	424
		Individual 10, auditory	15-20 each, hand-cut	1.53	2.76	653
		Individual 10, area 18	15-20 each, hand-cut	2.48	5.37	242
		individual	# of sections	thickness, spacing,	% AcD cells	% shared root cells	# of neurons
	Macaque, GM	Individual 1	4, cryostat	á 50 µm, 1.6 mm cortex	5.44	2.72	294
		Individual 2, ipsilateral	7, cryostat	á 50 µm, 1.4 mm cortex	4.86	2.78	432
			staining series DAB brown RP
		Individual 2, ipsilateral	17, cryostat	á 50 µm, 3.5 mm cortex	3.06	5.5	816
			staining series Ni-Co intensification
		Individual 2, contralateral	18, cryostat	á 50 µm, 9.0 mm cortex	5.38	3.23	93
		Individual 2, intraparietal	28, cryostat	á 50 µm, 14.0 mm cortex	2.87	1.64	731
		Individual 3	20, cryostat	á 50 µm, 4.0 mm cortex	3.8	4.9	184
		Individual 8	9, cryostat	á 50 µm, 3.6 mm cortex	4.3	3.46	231
	individual	# of sections	thickness	% AcD cells	% shared root cells	# of neurons
	Individual 6	20, hand-cut	200-250 µm	3.58	5.21	307
	Individual 7	20, hand-cut	200-250 µm	3.07	5.54	228
	individual	# of sections	thickness	# confocal stacks	% AcD cells	% shared root cells	# of neurons
	Individual 2, cingulate cortex	2, cryostat	á 50 µm, n.a.	10	5.97	2.13	704
	Individual 2, S2 cortex	2, cryostat	á 50 µm, n.a.	16	3.02	0.93	430
	Individual 2, A1 cortex	2, cryostat	á 50 µm, n.a.	23	5.09	1.7	471
	Individual 2, V1 cortex	2, cryostat	á 50 µm, n.a.	16	3.12	1.15	609
	Individual 2, ips cortex	2, cryostat	á 50 µm, n.a.	14	5.43	0.64	313
	Individual 2, parietal cortex	2, cryostat	á 50 µm, n.a.	14	4.26	1	399
	individual	# of sections	thickness	# confocal stacks	% AcD cells	% shared root cells	# of neurons
	Individual 4, cingulate cortex	2, cryostat	á 50 µm, n.a.	10	3.98	0.9	533
	Individual 4, S2 cortex	2, cryostat	á 50 µm, n.a.	11	3.57	1.19	252
	Individual 4, A1 cortex	2, cryostat	á 50 µm, n.a.	13	4.74	2.19	274
	Individual 4, V1 cortex	2, cryostat	á 50 µm, n.a.	19	4	2.4	500
	Individual 4, ips cortex	2, cryostat	á 50 µm, n.a.	15	5.52	1.33	525
	Individual 4, parietal	2, cryostat	á 50 µm, n.a.	4	4.93	4.93	142
	individual	# of sections	thickness	# confocal stacks	% AcD cells	% shared root cells	# of neurons
	Individual 5, cingulate cortex	2, cryostat	á 50 µm, n.a.	19	6.95	2.96	676
	Individual 5, S2 cortex	2, cryostat	á 50 µm, n.a.	20	6.38	2.55	549
	Individual 5, A1 cortex	2, cryostat	á 50 µm, n.a.	25	5.31	2.21	452
	Individual 5, V1 cortex	2, cryostat	á 50 µm, n.a.	16	3.48	0.46	431
	Individual 5, ips cortex	2, cryostat	á 50 µm, n.a.	16	4.15	2.24	313
	Individual 5, parietal cortex	2, cryostat	á 50 µm, n.a.	14	7.14	4.76	210
