# Supplementary material for: Neocortical pyramidal neurons with axons emerging from dendrites are frequent in non-primates, but rare in monkey and human
Source: eLife. 2022 Apr 20;11:e76101. doi: 10.7554/eLife.76101 (PMC9159751; doi:10.7554/eLife.76101)
Supplement: Figure 6—source data 1. [file elife-76101-fig6-data1.xlsx]

## Sheet: Tabelle1
Source data of Figure 4
	Biocytin tracing; spine density per 100 µm basal dendrite normalized to the average of the non-AcD which has been set to 1
Species	rat				rat				ferret
	non-AcD	shared root	Summary		non-AcD	AcD	Summary		non-AcD	AcD	Summary
	0.91261	0.804457			0.9228	1.0424			0.994638	1.0312
	0.566562	0.522735			0.9932	0.9722			1.13067	0.945435
	1.01199	0.847443			0.9395	0.9718			1.21506	0.749671
	0.948557	0.939812			1.0259	1.2251			0.696571	1.0794
	0.983024	0.925011			0.5781	0.7154			0.854381	0.85316
	1.16044	0.918195			0.7157	0.5509			0.51462	0.531706
	1.08717	0.951997			1.1705	0.913			0.867448	0.981335
	1.10869	1.27557			1.0305	0.6767			1.13179	0.977016
	0.981747	0.87896			0.8347	0.7494			0.947407	0.771266
	0.899935	1.05658			0.9796	0.7801			0.787048	0.635738
	1.00085	0.70861			0.9353	0.9174			0.964361	1.23512
	1.11394	1.25792			1.3241	1.1767			1.31661	1.26314
	1.22491	1.18925			1.3837	1.2806			0.746515	1.09862
	1.15443	1.08623			1.5057	1.2232			1.24843	1.35758
	0.845139	0.890721			1.2379	1.4129			1.28747	1.18978
					0.7403	0.7635			1.29699	1.13015
					0.6823	0.9578
Average	1	0.950233		Average	0.999988	0.960535		Average	1	0.989395
	Mann-Whitney rank sum test		p = 0,300		Mann-Whitney U statistics		p = 0,630		Mann-Whitney rank sum test		p = 0,836
	Statistics done with SigmaPlot 12.3		n.s.				n.s.				n.s.
n	15	15		n	17	17		n	16	16
mean	1	0.95		mean	1	0.961		mean	1	0.989
median	1.001	0.925		median	0.98	0.958		median	0.979	1.006
S.D.	0.162	0.202		S.D.	0.258	0.241		S.D.	0.244	0.233
SEM.	0.0417	0.0521		SEM.	0.0625	0.0584		SEM.	0.061	0.0582
C.I. of mean	0.089	0.112		C.I. of mean	0.133	0.124		C.I. of mean	0.13	0.124
Missing Data	0	0		Missing Data	0	0		Missing Data	0	0
measure of effect size	n.a.	n.a.		measure of effect size	n.a.	n.a.		measure of effect size	n.a.	n.a.
Abbreviations:
AcD, spine density of the axon carrying dendrite
non-AcD, spine density of regular basal dendrite(s) of the neuron assessed
n.s., non significant
