# Supplementary material for: Neocortical pyramidal neurons with axons emerging from dendrites are frequent in non-primates, but rare in monkey and human
Source: eLife. 2022 Apr 20;11:e76101. doi: 10.7554/eLife.76101 (PMC9159751; doi:10.7554/eLife.76101)
Supplement: Figure 7—source data 1. [file elife-76101-fig7-data1.xlsx]

## Sheet: Tabelle1
Data Figure 7A	Human, GM	individual	# of sections	thickness, spacing,	# of interneurons	layers
		Individual 1	4 vibratome	~150 µm, n.a.	346 cells, all types	II-VI
		Individual 2	8, vibratome	~150 µm, n.a.	337, cells, all types	II-VI
		Individual 4	~10, hand-cut	200-250 µm	106, cells, all types	II-VI
Data Figure 7B	Kitten occipital cortex
	postnatal age (P)	P1-5	P7-9	P15-18	P21-23	P30-33	P40, adult
	% NPY-ir	n.d.	10	10.99	10.45	10.45	9.38
	neurons with AcD	(too few cells)	14.55	14.58	15.09	17.07	14.46
	in the gray matter			11.52	12.33	13.94
	mean		12.275	12.3633	12.6233	13.82	11.92	(plotted)	sum of NPY-ir
	n of animals		2	3	3	3	2		gray matter neurons
	total n of neurons		105	352	299	271	147		1174
	% NPY+ axonal	n.d.	4.63	6.56	5.48	6.87	n.d.
	loop cells with AcD	(too few cells)	6.76	3.49	4.24	6.25	(too few cells)
	in the subplate/			5.7	6.89	3.03
	white matter
	mean		5.695	5.25	5.53667	5.38333		(plotted)	sum of NPY-ir
	n of animals		2	3	3	3			axonal loop neurons
	total n of neurons		364	536	274	277			1451
	% SST-ir	25	44.44	42.11	43.18	52.44	46.23
	neurons with AcD	30.44	41.74	44.74	50.98	46.55
	in the gray matter	32.43
	mean	29.29	43.09	43.425	47.08	49.495	46.23	(plotted)	sum of SST-ir
	n of animals	3	2	2	2	2	1		gray matter neurons
	total n of neurons	137	277	323	327	338	199		1601
									total: 4226 peptidergic
									neurons assessed
largely determined by perpendicular tracks through all layers (pia-into-WM-and-back) in one round of counting
the number of sections varied because the density of labeled cells varied: minimum 3 - sometimes 10 sections were screened
